# Supplementary material
Source: PubMed Central journal article supplement (PMC1913802)
Supplement: plntphys_pp.107.096586_2.pdf [file plntphys_pp.107.096586_2.pdf]

## Supplementary Figure Legends

Figure S1. A. Nucleotide and deduce amino acid sequences of indica rice *YAB1* cDNA.

B. Comparison of amino acid sequences of rice *indica* and *japonica* *YAB1* proteins.

Figure S2. Southern blot analysis of *YAB1* transgene copy numbers in nine independent lines.

Figure S3. Co-suppression of *YAB1* expression induced *GA3ox2* and *GA20ox2* expression.

A. Comparison of transcript levels by semi-quantitative RT-PCR of *YAB1*, *YAB2* and *DL* in a *YAB1* co-suppression line (Y8). Actin transcripts were measured as controls.

B. Comparison of *GA3ox2*, *GA20ox2* and *GA2ox3* transcript levels between wild type and Y8 plants by RNA gel blot hybridization.

Figure S4. GA transiently induced expression of *YAB1* in seedlings.

Rice seedlings at 4-leaf stage sprayed with 50 M of GA3 and the aerial parts were harvested at different time points as indicated. Total RNAs were analysed by RNA gel blot using *YAB1* cDNA as probe.
